# Supplementary material for: Changes of Thermostability, Organic Solvent, and pH Stability in Geobacillus zalihae HT1 and Its Mutant by Calcium Ion
Source: MDPI journal article supplement (doi:10.3390/ijms20102561), 2019-05-24
Supplement: s1 [file s1]

CLUSTAL O(1.2.4) multiple sequence alignment

|                           |                                                                        |     |
|---------------------------|------------------------------------------------------------------------|-----|
| wt_HT1_unmutated_sequence | -----                                                                  | 0   |
| 5M_Full_Sequence          | GGTCTGCTAGCTGTGGTATGGCTGTGCAGGTCGTAATCACTGCATAATTCGTGTCGCTCA           | 60  |
| wt_HT1_unmutated_sequence | -----                                                                  | 0   |
| 5M_Full_Sequence          | AGGCGCACTCCCCTTCTGGATAATGTTTTTGGCCGACATCATAACGGTCTGGCAAAAT             | 120 |
| wt_HT1_unmutated_sequence | -----                                                                  | 0   |
| 5M_Full_Sequence          | ATTCTGAAATGAGCTGTTGACAATTAATCATCGGCTCGTATAATGTGTGGAAATGTGAGC           | 180 |
| wt_HT1_unmutated_sequence | -----                                                                  | 0   |
| 5M_Full_Sequence          | GGATAACAATTCACACAGGAAACAGTATTGATGTCCTTATATCTAGACATCATCATCA             | 240 |
| wt_HT1_unmutated_sequence | -----GCATCCCTACGCGCCAATGATGCACCGATTGTGCT                               | 35  |
| 5M_Full_Sequence          | TCATCATCTGGTCCGCGTGGATCCGCATCCCTACGCGCCAATGATGCACCGATTGTGCT<br>*****   | 300 |
| wt_HT1_unmutated_sequence | TCTCCATGGGTTTACCGGATGGGGACGAGAGGAAATGTTTGGATTCAAGTATTGGGGCGG           | 95  |
| 5M_Full_Sequence          | TCTCCATGGGTTTACCGGATGGGGACGAGAGGAAATGTTTGGATTCAAGTATTGGGGCGG<br>*****  | 360 |
| wt_HT1_unmutated_sequence | CGTGC GCGGATATCGAACAAATGGCTGAAAGSACACGGTTATCGAACGTATACGCTGGC           | 155 |
| 5M_Full_Sequence          | CGTGC GCGGATATCGAACAAATGGCTGAAAGSACACGGTTATCGAACGTATACGCTGGC<br>*****  | 420 |
| wt_HT1_unmutated_sequence | GGTCGGACCGCTCTCGAGCAACTGGGACCGGGCGTGTGAAGCGTATGCTCAGCTTGTGCG           | 215 |
| 5M_Full_Sequence          | GGTCGGACCGCTCTCGAGCAACTGGGACCGGGCGTGTGAAGCGTATGCTCAGCTTGTGCG<br>*****  | 480 |
| wt_HT1_unmutated_sequence | CGGGACGGTCGATTATGGGGCAGCCCATGCGGCAAAAGCACGGCCATGCGCGGTTTGGCCG          | 275 |
| 5M_Full_Sequence          | CGGGACGGTCGATTATGGGGCAGCCCATGCGGCAAAAGCACGGCCATGCGCGGTTTGGCCG<br>***** | 540 |
| wt_HT1_unmutated_sequence | CACTTATCCCGGCTGTTGCCGGAATTGAAAAGGGGTGGCCGCATCCATATCATCGCCCA            | 335 |
| 5M_Full_Sequence          | CACTTATCCCGGCTGTTGCCGGAATTGAAAAGGGGTGGCCGCATCCATATCATCGCCCA<br>*****   | 600 |
| wt_HT1_unmutated_sequence | CAGCCAAGGGGGCAACCGCCCGCATGCTTGTCTCGCTCCTAGAGAACGGAAGCCAAGA             | 395 |
| 5M_Full_Sequence          | CAGCCAAGGGGGCAACCGCCCGCATGCTTGTCTCGCTCCTAGAGAACGGAAGCCAAGA<br>*****    | 660 |
| wt_HT1_unmutated_sequence | AGAGCGGGAGTACGCCAAGGCGCATAACGTGTCGTTGTCAACGTTGTTGAAAGTGGACA            | 455 |
| 5M_Full_Sequence          | AGAGCGGGAGTACGCCAAGGCGCATAACGTGTCGTTGTCAACGTTGTTGAAAGTGGACA<br>*****   | 720 |
| wt_HT1_unmutated_sequence | TCATTTTGTGTTGAGTGTGACGACCATCGCCACTCCTCATGACGGGACGACGCTTGTCAA           | 515 |
| 5M_Full_Sequence          | TCATTTTGTGTTGAGTGTGACGACCATCGCCACTCCTCATGACGGGACGACGCTTGTCAA<br>*****  | 780 |
| wt_HT1_unmutated_sequence | CATGGTTGATTTACCGATCGCTTTTTGACTTGCAAAAAGCGGTGTTGGAAGCGGCGC              | 575 |
| 5M_Full_Sequence          | CATGGTTGATTTACCGATCGCTTTTTGACTTGCAAAAAGCGGTGTTGGAAGCGGCGC<br>*****     | 840 |
| wt_HT1_unmutated_sequence | TGTCGCCAGCAACGTGCCGTACACGAGTCAAGTATACGATTTAAGCTCGACCAATGGGG            | 635 |
| 5M_Full_Sequence          | TGTCGCCAGCAACGTGCCGTACACGAGTCAAGTATACGATTTAAGCTCGACCAATGGGG<br>*****   | 900 |

|                           |                                                              |      |
|---------------------------|--------------------------------------------------------------|------|
| wt_HT1_unmutated_sequence | ACTGCGCCGCCAGCCGGTGAATCGTTCGACCATTATTTGAAAGGCTCAAGCGCTCCCC   | 695  |
| 5M_Full_Sequence          | ACTGCGCCGCCAGCCGGTGAATCGTTCGACCATTATTTGATGGCTCAAGCGCTCCCC    | 960  |
| wt_HT1_unmutated_sequence | TGTTTGGACGTCCACAGATACCGCCCGCTACGATTTATCCGTTTCCGGAGCGAGAGTT   | 755  |
| 5M_Full_Sequence          | TGTTTGGACGTCCACAGATACCGCCCGCTACGATTTATCCGTTTCCGGAGCTTGAGTT   | 1020 |
| wt_HT1_unmutated_sequence | GAATCAATGGGTGCAAGCAAGCCGAATACGTATTATTTGAGTTTCTACAGAACGGAC    | 815  |
| 5M_Full_Sequence          | GAATCAATGGGTGCAAGCAAGCCGAATACGTATTATTTGAGTTTCTACAGAACGGAC    | 1080 |
| wt_HT1_unmutated_sequence | GTATCGCGGAGCGCTCACAGGCAACCATTATCCCGAACTCGGAATGAATGCATTACGCGC | 875  |
| 5M_Full_Sequence          | GTATCGCGGAGCGCTCACAGGCAACCATTATCCCGAACTCGGAATGAATGCATTACGCGC | 1140 |
| wt_HT1_unmutated_sequence | GGTCGTATGCGCTCCGTTTCTCGGTTCTGACCGAATCGACGCTCGGCATTGACGACCG   | 935  |
| 5M_Full_Sequence          | GGTCGTATGCGCTCCGTTTCTCGGTTCTGACCGGAGCGACGCTCGGCATTGACGACCG   | 1200 |
| wt_HT1_unmutated_sequence | ATGTTGGGAGAACGATGGCATTGTCAATACGGTTCCATGAACGGTCCAAAGCGTGGATC  | 995  |
| 5M_Full_Sequence          | ATGTTGGGAGAACGATGGCATTGTCAATACGGTTCCATGAACGGTCCAAAGCGTGGATC  | 1260 |
| wt_HT1_unmutated_sequence | AAGCGATCGSATCGTGCCGTATGACGGGACGTTGAAAAAAGGGTTTGGAAATGATAGGG  | 1055 |
| 5M_Full_Sequence          | AAGCGATCGSATCGTGCCGTATGACGGGACGTTGAAAAAAGGGTTTGGAAATGATAGGG  | 1320 |
| wt_HT1_unmutated_sequence | AACGTACAACGTCGACCATTTGGAAATCATCGGCGTTGACCCGAATCCGTCATTTGATAT | 1115 |
| 5M_Full_Sequence          | AACGTACAACGTCGACCATTTGGAAATCATCGGCGTTGACCCGAATCCGTCATTTGATAT | 1380 |
| wt_HT1_unmutated_sequence | TCGCGCCTTTTATTTGCGGCTTGCCGAGCAGTTGSCGAGCTTGACGCTTAA-----     | 1167 |
| 5M_Full_Sequence          | TCGCGCCTTTTATTTGCGGCTTGCCGAGCAGTTGSCGAGCTTGACGCTTAAAGAAATCCC | 1440 |
| wt_HT1_unmutated_sequence | -----                                                        | 1167 |
| 5M_Full_Sequence          | GGGTCGACTCGAGCGGCCGCATCGTACTGACTGACGATCTGCCTCGCGGTTACGTATA   | 1500 |
| wt_HT1_unmutated_sequence | -                                                            | 1167 |
| 5M_Full_Sequence          | G                                                            | 1501 |

**Figure S1.** DNA sequence alignments of 5M mutated lipase and original sequence of T1 lipase for verification of mutation. The multiple sequences alignment was generated from [https://www.ebi.ac.uk/Tools/services/rest/clustalo/result/clustalo-I20190408-165909-0083-17877188-p2m/aln-clustal\\_num](https://www.ebi.ac.uk/Tools/services/rest/clustalo/result/clustalo-I20190408-165909-0083-17877188-p2m/aln-clustal_num). The mutated sequences are marked in red boxes.

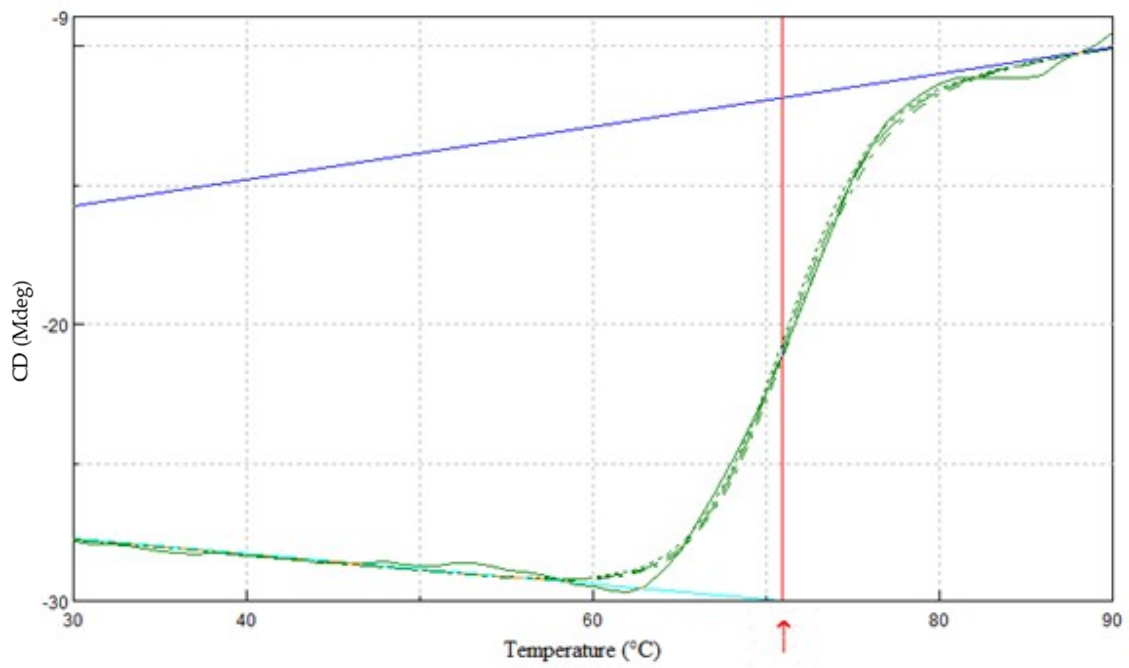

(a)

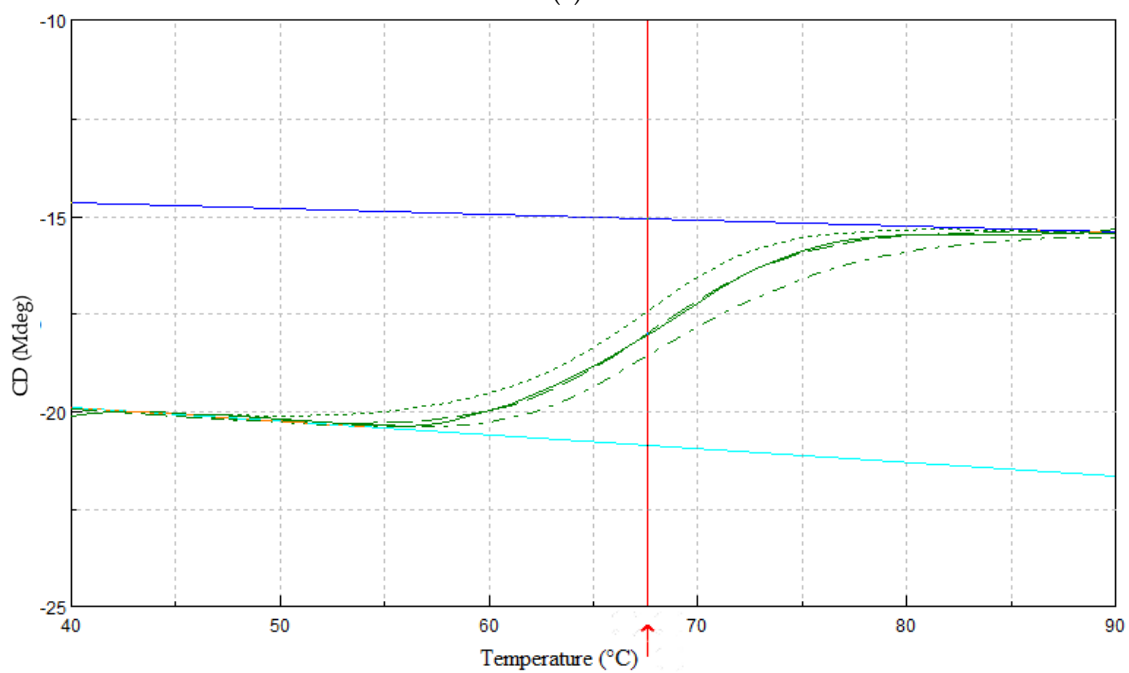

(b)

**Figure S2.** Melting temperature ( $T_m$ ) curve of wt-HT1 and 5M mutant lipases using Circular Dichroism without calcium ion. (a) Temperature profile of wt-HT1 lipase. (b) Temperature profile of 5M mutant lipase. Red arrow indicated the thermal denaturation point of lipases.

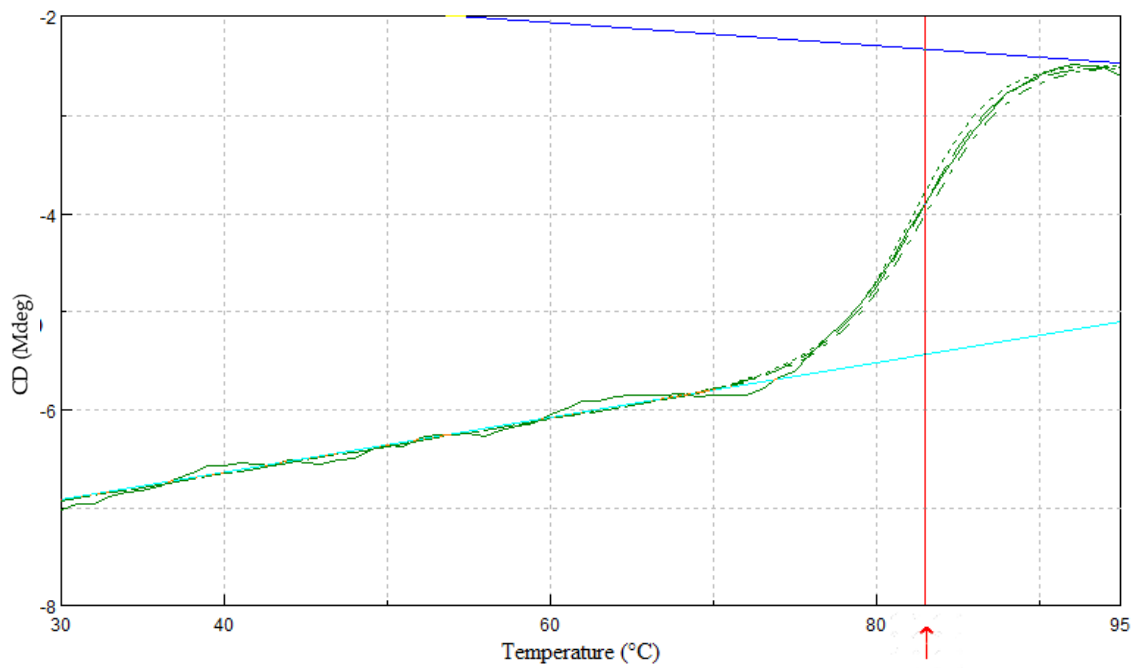

(a)

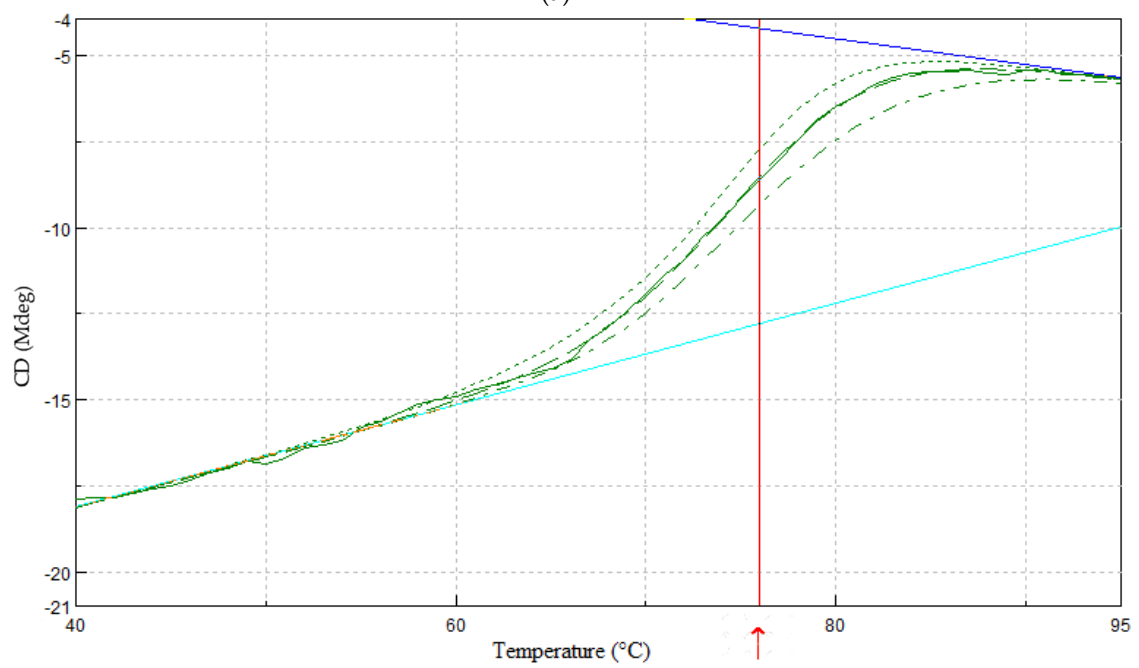

(b)

**Figure S3.** Melting temperature ( $T_m$ ) curve of wt-HT1 and 5M mutant lipases using Circular Dichroism with the presence of 1 mM calcium ion. (a) Temperature profile of wt-HT1 lipase with 1 mM calcium ion. (b) Temperature profile of 5M mutant lipase with 1 mM calcium ion. Red arrow indicated the thermal denaturation point of lipases.

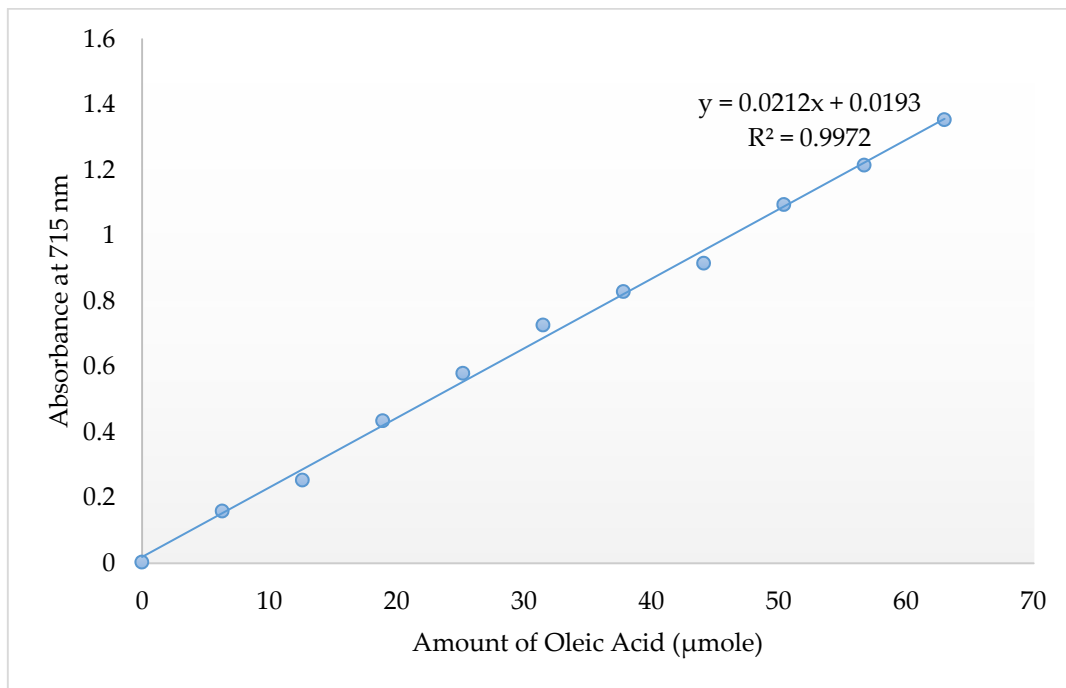

**Figure S4.** Oleic acid standard curve based on the method of Kwon and Rhee [59].
